# Supplementary material for: Computational identification of promising thermoelectric materials among known quasi-2D binary compounds
Source: Royal Society of Chemistry journal article supplement (doi:10.1039/c6ta04121c), 2016-01-01
Supplement: c6ta04121c1.pdf [file c6ta04121c1.pdf]

**Electronic Supplementary Information**

**“Computational Identification of Promising Thermoelectric  
Materials Among Known Quasi-2D Binary Compounds”**

Prashun Gorai,<sup>†,‡</sup> Eric S. Toberer,<sup>†,‡</sup> and Vladan Stevanović<sup>\*,†,‡</sup>

<sup>†</sup>*Colorado School of Mines, Golden, Colorado 80401, USA*

<sup>‡</sup>*National Renewable Energy Laboratory, Golden, Colorado 80401, USA*

E-mail: prashun.gorai@nrel.gov

## Predicted Thermoelectric Performance of Binary Quasi-2D Materials

Table S1: Material properties used to determine  $\beta_{SE}$  obtained from high-throughput DFT calculations. The parameters include: chemical formula, space group number (SG), Inorganic Crystal Structure Database (ICSD) identification number,  $\beta_{SE}$  for valence band (p-type) and conduction band (n-type) transport, lattice thermal conductivity ( $\kappa_L$ ) in  $\text{Wm}^{-1}\text{K}^{-1}$ , bulk modulus ( $B$ ) in GPa, valence band (VB) density of states (DOS) effective mass  $m_{DOS,VB}^*$  and conduction band (CB) DOS effective mass  $m_{DOS,CB}^*$  in the units of  $m_e$ , and VB degeneracy  $N_{b,VB}$  and CB degeneracy  $N_{b,CB}$ .

| Compound                        | SG  | ICSD   | $\beta_{SE}(p)$ | $\beta_{SE}(n)$ | $\kappa_L$ | $B$ | $m_{DOS,VB}^*$ | $m_{DOS,CB}^*$ | $N_{b,VB}$ | $N_{b,CB}$ |
|---------------------------------|-----|--------|-----------------|-----------------|------------|-----|----------------|----------------|------------|------------|
| AgCl                            | 63  | 056545 | 8.31            | 4.27            | 6.8        | 49  | 2.13           | 0.07           | 7.0        | 1.0        |
| AgI                             | 85  | 028230 | 3.18            | 6.14            | 1.6        | 16  | 1.08           | 0.07           | 2.0        | 1.0        |
| AgI                             | 186 | 001899 | 5.21            | 5.22            | 3.4        | 31  | 1.84           | 0.07           | 4.0        | 1.0        |
| AlCl <sub>3</sub>               | 12  | 039566 | 6.64            | 3.48            | 2.5        | 20  | 1.67           | 1.49           | 5.0        | 3.0        |
| Al <sub>2</sub> Te <sub>3</sub> | 14  | 406353 | 4.87            | 7.04            | 1.1        | 17  | 2.57           | 2.72           | 3.0        | 4.0        |
| AsGe                            | 12  | 610598 | 4.94            | 9.42            | 2.8        | 30  | 0.55           | 0.04           | 2.0        | 1.0        |
| As <sub>2</sub> Ge              | 55  | 023872 | 10.22           | 44.84           | 1.8        | 25  | 0.62           | 0.10           | 3.0        | 4.0        |
| As <sub>2</sub> O <sub>3</sub>  | 14  | 100434 | 2.08            | 3.84            | 1.5        | 19  | 8.26           | 1.16           | 3.0        | 2.0        |
| As <sub>2</sub> O <sub>4</sub>  | 62  | 010436 | 1.78            | 2.85            | 2.5        | 32  | 9.75           | 1.73           | 3.0        | 2.0        |
| As <sub>2</sub> S <sub>3</sub>  | 14  | 015239 | 4.88            | 4.58            | 1.4        | 17  | 1.74           | 3.80           | 3.0        | 4.0        |
| As <sub>2</sub> Se <sub>3</sub> | 14  | 043226 | 3.68            | 8.52            | 1.4        | 19  | 1.37           | 1.70           | 2.0        | 4.0        |
| As <sub>2</sub> Si              | 55  | 611405 | 2.89            | 7.57            | 1.9        | 24  | 0.34           | 0.35           | 1.0        | 2.0        |
| AuBr                            | 138 | 200287 | 3.85            | 3.38            | 1.3        | 19  | 1.29           | 0.32           | 2.0        | 1.0        |
| AuBr                            | 141 | 200286 | 6.42            | 2.29            | 1.2        | 17  | 1.46           | 0.62           | 3.0        | 1.0        |
| AuCl                            | 141 | 006052 | 1.93            | 1.64            | 1.4        | 20  | 0.77           | 1.00           | 1.0        | 1.0        |
| AuI                             | 138 | 024619 | 4.89            | 13.93           | 1.2        | 17  | 0.86           | 0.76           | 2.0        | 4.0        |
| BN                              | 187 | 240999 | 4.70            | 3.31            | 5.3        | 34  | 6.15           | 1.12           | 8.0        | 3.0        |
| BN                              | 160 | 162871 | 1.90            | 4.45            | 6.3        | 34  | 4.28           | 0.53           | 4.0        | 3.0        |
| BN                              | 194 | 162870 | 4.68            | 3.35            | 5.4        | 34  | 6.17           | 1.09           | 8.0        | 3.0        |
| BN                              | 194 | 027987 | 5.98            | 5.22            | 4.8        | 30  | 0.81           | 0.52           | 4.0        | 3.0        |
| BN                              | 42  | 020946 | 1.71            | 2.30            | 6.2        | 34  | 1.00           | 0.12           | 2.0        | 1.0        |
| BN                              | 186 | 077374 | 5.32            | 4.38            | 5.3        | 33  | 5.01           | 0.27           | 8.0        | 2.0        |
| BN                              | 14  | 162883 | 4.21            | 2.21            | 3.9        | 29  | 1.85           | 1.07           | 4.0        | 2.0        |
| BaO                             | 129 | 173922 | 1.66            | 3.95            | 4.7        | 38  | 5.35           | 0.49           | 3.0        | 2.0        |

| Compound                        | SG  | ICSD   | $\beta_{SE}(p)$ | $\beta_{SE}(n)$ | $\kappa_L$ | $B$ | $m_{DOS,VB}^*$ | $m_{DOS,CB}^*$ | $N_{b,VB}$ | $N_{b,CB}$ |
|---------------------------------|-----|--------|-----------------|-----------------|------------|-----|----------------|----------------|------------|------------|
| BiBr <sub>3</sub>               | 12  | 100294 | 6.75            | 1.87            | 0.9        | 11  | 3.61           | 0.72           | 5.0        | 1.0        |
| BiI <sub>3</sub>                | 148 | 053634 | 3.04            | 18.37           | 0.9        | 12  | 8.13           | 1.04           | 4.0        | 6.0        |
| BiI <sub>3</sub>                | 162 | 020676 | 4.14            | 2.93            | 0.8        | 11  | 8.38           | 0.35           | 5.0        | 1.0        |
| BiTe                            | 164 | 100654 | 3.84            | 2.17            | 3.0        | 34  | 0.93           | 0.48           | 2.0        | 1.0        |
| Bi <sub>2</sub> O <sub>3</sub>  | 160 | 168810 | 10.29           | 1.08            | 2.4        | 32  | 4.31           | 1.98           | 7.0        | 1.0        |
| Bi <sub>2</sub> O <sub>3</sub>  | 14  | 015752 | 4.88            | 2.31            | 4.9        | 65  | 2.04           | 0.55           | 3.0        | 1.0        |
| Bi <sub>2</sub> O <sub>3</sub>  | 114 | 041764 | 1.87            | 10.17           | 1.9        | 32  | 5.85           | 0.07           | 2.0        | 1.0        |
| Bi <sub>2</sub> Se <sub>3</sub> | 166 | 042545 | 4.96            | 7.42            | 3.4        | 32  | 0.08           | 0.04           | 1.0        | 1.0        |
| Bi <sub>2</sub> Te <sub>3</sub> | 166 | 184631 | 6.41            | 6.81            | 3.5        | 32  | 0.05           | 0.05           | 1.0        | 1.0        |
| BrIn                            | 63  | 055189 | 5.03            | 9.34            | 2.2        | 19  | 0.38           | 0.13           | 2.0        | 2.0        |
| BrTl                            | 63  | 109144 | 13.22           | 20.19           | 1.9        | 19  | 0.48           | 0.24           | 4.0        | 4.0        |
| Br <sub>2</sub> Cd              | 166 | 052367 | 2.67            | 4.22            | 2.1        | 18  | 8.80           | 0.10           | 5.0        | 1.0        |
| Br <sub>2</sub> Cd              | 186 | 025782 | 3.32            | 5.32            | 1.8        | 18  | 12.77          | 0.09           | 6.0        | 1.0        |
| Br <sub>2</sub> Cd              | 166 | 031536 | 3.88            | 5.18            | 1.8        | 18  | 14.09          | 0.09           | 7.0        | 1.0        |
| Br <sub>2</sub> Fe              | 164 | 409571 | 0.56            | 0.76            | 13.7       | 72  | 6.11           | 18.61          | 2.0        | 4.0        |
| Br <sub>2</sub> Hg              | 143 | 151889 | 7.53            | 6.42            | 1.4        | 18  | 9.22           | 0.09           | 8.0        | 1.0        |
| Br <sub>2</sub> Mg              | 164 | 165972 | 0.68            | 3.73            | 2.5        | 18  | 1.60           | 0.09           | 1.0        | 1.0        |
| Br <sub>2</sub> Zn              | 166 | 026080 | 6.07            | 9.28            | 2.5        | 20  | 8.32           | 0.62           | 9.0        | 4.0        |
| Br <sub>3</sub> Fe              | 148 | 076421 | 0.25            | 0.42            | 8.7        | 61  | 7.70           | 8.37           | 1.0        | 1.5        |
| Br <sub>3</sub> In              | 12  | 065198 | 0.81            | 3.67            | 1.2        | 14  | 2.41           | 0.19           | 1.0        | 1.0        |
| Br <sub>3</sub> Rh              | 12  | 028245 | 15.39           | 5.86            | 1.9        | 21  | 4.56           | 2.15           | 11.0       | 4.0        |
| Br <sub>3</sub> Ti              | 148 | 039242 | 0.63            | 0.67            | 8.0        | 54  | 7.74           | 6.98           | 2.0        | 2.0        |
| Br <sub>3</sub> Ti              | 2   | 039784 | 0.63            | 0.66            | 8.0        | 54  | 7.75           | 7.00           | 2.0        | 2.0        |
| CaI <sub>2</sub>                | 164 | 052280 | 1.04            | 2.96            | 1.7        | 13  | 0.88           | 2.00           | 1.0        | 3.0        |
| Ca <sub>3</sub> N <sub>2</sub>  | 194 | 162797 | 1.42            | 3.64            | 7.7        | 52  | 0.40           | 0.08           | 1.0        | 1.0        |
| CdI <sub>2</sub>                | 164 | 108924 | 8.32            | 17.81           | 1.2        | 17  | 6.24           | 1.22           | 7.0        | 6.0        |
| CdI <sub>2</sub>                | 164 | 020745 | 4.15            | 6.22            | 1.4        | 16  | 7.32           | 1.13           | 5.0        | 3.0        |
| CdI <sub>2</sub>                | 164 | 053983 | 1.78            | 11.11           | 1.9        | 16  | 5.53           | 1.32           | 3.0        | 6.0        |
| ClTl                            | 63  | 109143 | 12.06           | 14.89           | 2.0        | 20  | 0.54           | 0.38           | 4.0        | 4.0        |
| Cl <sub>2</sub> Mg              | 115 | 051245 | 0.36            | 2.22            | 2.3        | 14  | 16.60          | 0.16           | 2.0        | 1.0        |
| Cl <sub>2</sub> Mg              | 164 | 017063 | 0.47            | 2.34            | 3.3        | 20  | 2.04           | 0.14           | 1.0        | 1.0        |

| Compound                        | SG  | ICSD   | $\beta_{SE}(p)$ | $\beta_{SE}(n)$ | $\kappa_L$ | $B$ | $m_{DOS,VB}^*$ | $m_{DOS,CB}^*$ | $N_{b,VB}$ | $N_{b,CB}$ |
|---------------------------------|-----|--------|-----------------|-----------------|------------|-----|----------------|----------------|------------|------------|
| Cl <sub>2</sub> Mg              | 166 | 056147 | 0.42            | 2.21            | 3.4        | 20  | 2.45           | 0.15           | 1.0        | 1.0        |
| Cl <sub>2</sub> Mg              | 2   | 051247 | 2.61            | 1.39            | 2.0        | 13  | 5.24           | 0.35           | 5.0        | 1.0        |
| Cl <sub>2</sub> Pd              | 14  | 421221 | 4.62            | 2.97            | 1.9        | 19  | 1.38           | 1.12           | 3.0        | 2.0        |
| Cl <sub>2</sub> Zn              | 137 | 026152 | 0.92            | 3.38            | 2.0        | 17  | 6.04           | 0.14           | 2.0        | 1.0        |
| Cl <sub>2</sub> Zr              | 160 | 030052 | 4.28            | 1.17            | 4.6        | 31  | 1.55           | 2.68           | 4.0        | 2.0        |
| Cl <sub>3</sub> Mo              | 15  | 026109 | 1.35            | 1.01            | 13.3       | 87  | 10.37          | 1.70           | 4.0        | 1.5        |
| Cl <sub>3</sub> Mo              | 12  | 026108 | 1.48            | 0.72            | 16.4       | 87  | 3.15           | 10.44          | 3.0        | 3.0        |
| Cl <sub>3</sub> Sc              | 148 | 074517 | 0.49            | 1.55            | 1.8        | 15  | 3.28           | 12.28          | 1.0        | 4.0        |
| Cl <sub>3</sub> Y               | 12  | 015684 | 1.51            | 1.92            | 1.3        | 12  | 3.03           | 2.04           | 2.0        | 2.0        |
| Cl <sub>3</sub> Zr              | 162 | 043292 | 0.47            | 0.91            | 1.9        | 17  | 4.20           | 6.90           | 1.0        | 2.0        |
| Cl <sub>4</sub> Zr              | 13  | 026049 | 5.29            | 2.80            | 1.2        | 12  | 5.53           | 6.21           | 6.0        | 4.0        |
| Cl <sub>8</sub> Nb <sub>3</sub> | 164 | 408645 | 0.35            | 1.99            | 12.0       | 87  | 0.93           | 3.31           | 0.5        | 3.0        |
| CrF <sub>2</sub>                | 14  | 031827 | 0.24            | 0.48            | 26.4       | 140 | 5.30           | 1.62           | 1.0        | 1.0        |
| Cs <sub>2</sub> O               | 166 | 027919 | 7.03            | 3.32            | 1.2        | 12  | 8.29           | 0.17           | 9.0        | 1.0        |
| Cs <sub>2</sub> Te <sub>3</sub> | 36  | 053245 | 4.23            | 1.59            | 1.3        | 15  | 3.92           | 0.79           | 4.0        | 1.0        |
| CuI                             | 156 | 030363 | 6.58            | 7.70            | 1.7        | 22  | 2.25           | 0.07           | 4.0        | 1.0        |
| CuI                             | 164 | 080232 | 1.78            | 5.22            | 2.3        | 22  | 2.42           | 0.08           | 2.0        | 1.0        |
| CuI                             | 156 | 084217 | 1.78            | 5.26            | 2.3        | 22  | 2.43           | 0.08           | 2.0        | 1.0        |
| CuI                             | 129 | 246688 | 2.88            | 6.63            | 1.9        | 19  | 1.19           | 0.06           | 2.0        | 1.0        |
| F <sub>3</sub> Fe               | 150 | 029132 | 0.19            | 0.59            | 26.8       | 165 | 9.24           | 18.87          | 1.0        | 3.0        |
| F <sub>3</sub> Rh               | 150 | 029134 | 1.46            | 0.68            | 8.6        | 81  | 16.29          | 29.70          | 4.0        | 3.0        |
| F <sub>4</sub> Sn               | 139 | 016794 | 4.53            | 2.71            | 6.2        | 53  | 14.05          | 0.20           | 9.0        | 1.0        |
| FeI <sub>2</sub>                | 164 | 052369 | 0.59            | 1.08            | 10.3       | 60  | 6.68           | 12.22          | 2.0        | 4.0        |
| FeSe                            | 67  | 165938 | 3.65            | 0.64            | 24.9       | 121 | 1.20           | 4.36           | 4.0        | 2.0        |
| FeSe                            | 129 | 169257 | 3.20            | 0.63            | 24.9       | 121 | 1.50           | 4.42           | 4.0        | 2.0        |
| FeSe                            | 67  | 169297 | 3.14            | 0.63            | 24.9       | 121 | 1.54           | 4.47           | 4.0        | 2.0        |
| GaP                             | 166 | 635031 | 1.96            | 5.83            | 15.1       | 73  | 0.67           | 0.28           | 2.0        | 3.0        |
| GaS                             | 194 | 053587 | 1.61            | 8.96            | 3.2        | 28  | 0.48           | 0.70           | 1.0        | 4.0        |
| GaS                             | 166 | 040824 | 1.20            | 4.95            | 4.0        | 28  | 0.57           | 0.05           | 1.0        | 1.0        |
| GaS                             | 194 | 635254 | 1.75            | 17.84           | 3.0        | 27  | 0.44           | 0.86           | 1.0        | 7.0        |
| GaTe                            | 12  | 008249 | 2.43            | 9.11            | 1.6        | 20  | 0.42           | 0.24           | 1.0        | 2.0        |

| Compound                       | SG  | ICSD   | $\beta_{SE}(p)$ | $\beta_{SE}(n)$ | $\kappa_L$ | $B$ | $m_{DOS,VB}^*$ | $m_{DOS,CB}^*$ | $N_{b,VB}$ | $N_{b,CB}$ |
|--------------------------------|-----|--------|-----------------|-----------------|------------|-----|----------------|----------------|------------|------------|
| GaTe                           | 194 | 043328 | 3.15            | 14.85           | 2.0        | 21  | 0.22           | 0.21           | 1.0        | 3.0        |
| GeI <sub>2</sub>               | 187 | 027674 | 1.69            | 7.89            | 1.6        | 14  | 2.25           | 0.86           | 2.0        | 4.0        |
| GeI <sub>2</sub>               | 164 | 023176 | 5.71            | 8.92            | 1.4        | 16  | 2.32           | 0.22           | 4.0        | 2.0        |
| GeP                            | 12  | 637492 | 2.04            | 3.47            | 2.4        | 25  | 0.45           | 0.93           | 1.0        | 2.0        |
| GeS                            | 63  | 155418 | 21.11           | 1.97            | 5.1        | 36  | 0.12           | 0.24           | 4.0        | 1.0        |
| GeS                            | 62  | 038165 | 9.07            | 2.29            | 3.3        | 30  | 0.72           | 0.28           | 4.0        | 1.0        |
| GeSe                           | 62  | 637853 | 5.92            | 2.50            | 2.9        | 29  | 0.35           | 0.30           | 2.0        | 1.0        |
| GeTe                           | 160 | 655497 | 16.57           | 8.61            | 6.0        | 37  | 0.37           | 0.22           | 6.0        | 3.0        |
| HfO <sub>2</sub>               | 137 | 173966 | 1.48            | 1.34            | 27.9       | 192 | 9.57           | 0.45           | 4.0        | 1.0        |
| HfS <sub>2</sub>               | 164 | 638847 | 2.10            | 3.44            | 3.6        | 30  | 1.41           | 1.59           | 2.0        | 3.0        |
| HfSe <sub>2</sub>              | 164 | 603743 | 4.90            | 4.55            | 3.2        | 29  | 1.01           | 1.15           | 3.0        | 3.0        |
| HgI <sub>2</sub>               | 137 | 281133 | 6.03            | 8.58            | 0.8        | 13  | 4.16           | 0.09           | 4.0        | 1.0        |
| HgI <sub>2</sub>               | 137 | 022401 | 2.71            | 6.50            | 1.2        | 14  | 1.67           | 0.08           | 2.0        | 1.0        |
| HgI <sub>2</sub>               | 137 | 181575 | 2.71            | 6.71            | 1.2        | 14  | 1.67           | 0.07           | 2.0        | 1.0        |
| HgN <sub>6</sub>               | 29  | 021029 | 2.23            | 2.26            | 1.1        | 16  | 3.55           | 8.96           | 2.0        | 3.0        |
| Hg <sub>2</sub> I <sub>4</sub> | 137 | 241172 | 2.70            | 6.55            | 1.2        | 14  | 1.68           | 0.08           | 2.0        | 1.0        |
| IIn                            | 63  | 055183 | 21.95           | 15.60           | 1.9        | 17  | 0.45           | 0.31           | 6.0        | 4.0        |
| ITl                            | 63  | 055199 | 19.22           | 17.61           | 1.6        | 17  | 0.69           | 0.31           | 6.0        | 4.0        |
| I <sub>2</sub> Mg              | 164 | 052279 | 3.41            | 8.34            | 2.0        | 16  | 1.59           | 1.80           | 3.0        | 6.0        |
| I <sub>2</sub> Pb              | 164 | 068819 | 1.33            | 2.67            | 1.4        | 14  | 0.78           | 0.24           | 1.0        | 1.0        |
| I <sub>2</sub> Pb              | 156 | 024264 | 1.87            | 9.47            | 1.1        | 14  | 0.72           | 0.24           | 1.0        | 2.0        |
| I <sub>2</sub> Pb              | 166 | 077325 | 1.29            | 2.48            | 1.4        | 13  | 0.82           | 0.28           | 1.0        | 1.0        |
| I <sub>2</sub> Pb              | 166 | 108914 | 1.59            | 3.09            | 1.2        | 14  | 0.79           | 0.26           | 1.0        | 1.0        |
| I <sub>2</sub> Pb              | 166 | 042014 | 1.63            | 3.08            | 1.2        | 14  | 0.76           | 0.26           | 1.0        | 1.0        |
| I <sub>2</sub> Pb              | 186 | 024263 | 1.62            | 3.08            | 1.2        | 14  | 0.76           | 0.26           | 1.0        | 1.0        |
| I <sub>2</sub> Sn              | 12  | 002831 | 18.03           | 3.12            | 1.6        | 18  | 1.22           | 0.24           | 7.0        | 1.0        |
| I <sub>2</sub> Zn              | 166 | 077058 | 2.13            | 7.83            | 2.1        | 18  | 3.97           | 0.45           | 3.0        | 3.0        |
| I <sub>2</sub> Zr              | 31  | 024807 | 9.11            | 10.92           | 1.9        | 23  | 1.17           | 4.36           | 4.0        | 8.0        |
| I <sub>2</sub> Zr              | 11  | 026418 | 8.21            | 14.46           | 1.9        | 23  | 1.40           | 1.40           | 4.0        | 6.0        |
| I <sub>3</sub> Y               | 148 | 170773 | 1.15            | 1.26            | 1.0        | 12  | 1.36           | 5.83           | 1.0        | 2.0        |
| InSe                           | 187 | 640503 | 2.08            | 12.06           | 2.4        | 24  | 0.41           | 0.02           | 1.0        | 1.0        |

| Compound                        | SG  | ICSD   | $\beta_{SE}(p)$ | $\beta_{SE}(n)$ | $\kappa_L$ | $B$ | $m_{DOS,VB}^*$ | $m_{DOS,CB}^*$ | $N_{b,VB}$ | $N_{b,CB}$ |
|---------------------------------|-----|--------|-----------------|-----------------|------------|-----|----------------|----------------|------------|------------|
| InSe                            | 10  | 032714 | 6.28            | 8.17            | 2.3        | 22  | 0.30           | 0.19           | 2.0        | 2.0        |
| InSe                            | 160 | 041477 | 1.94            | 10.41           | 2.7        | 23  | 0.34           | 0.02           | 1.0        | 1.0        |
| InSe                            | 194 | 030377 | 1.95            | 11.69           | 2.4        | 24  | 0.46           | 0.02           | 1.0        | 1.0        |
| InSe                            | 12  | 071083 | 6.42            | 7.99            | 2.3        | 22  | 0.28           | 0.20           | 2.0        | 2.0        |
| In <sub>2</sub> Se <sub>3</sub> | 160 | 017008 | 8.87            | 10.82           | 2.9        | 27  | 2.01           | 0.02           | 6.0        | 1.0        |
| In <sub>2</sub> Te <sub>5</sub> | 9   | 000501 | 8.01            | 12.21           | 1.5        | 19  | 1.68           | 0.42           | 4.0        | 3.0        |
| MoO <sub>3</sub>                | 14  | 644067 | 5.74            | 5.14            | 2.9        | 38  | 14.77          | 0.70           | 8.0        | 2.0        |
| MoO <sub>3</sub>                | 62  | 030258 | 8.29            | 8.74            | 2.8        | 33  | 3.42           | 1.22           | 6.0        | 4.0        |
| MoSe <sub>2</sub>               | 160 | 016948 | 1.09            | 10.82           | 4.5        | 36  | 0.81           | 2.27           | 1.0        | 8.0        |
| N <sub>4</sub> Si <sub>3</sub>  | 62  | 156337 | 1.63            | 6.23            | 41.1       | 258 | 0.28           | 0.15           | 1.0        | 2.0        |
| NbS <sub>3</sub>                | 2   | 645323 | 0.84            | 1.10            | 18.8       | 117 | 4.11           | 0.52           | 2.0        | 1.0        |
| Nb <sub>2</sub> O <sub>5</sub>  | 12  | 025765 | 3.92            | 0.91            | 32.2       | 153 | 3.77           | 0.46           | 7.0        | 1.0        |
| NiO <sub>2</sub>                | 12  | 088720 | 0.62            | 9.25            | 5.4        | 42  | 10.14          | 2.81           | 2.0        | 8.0        |
| NiO <sub>2</sub>                | 166 | 078698 | 0.59            | 8.89            | 5.5        | 42  | 10.81          | 2.99           | 2.0        | 8.0        |
| OPb                             | 29  | 036250 | 1.55            | 21.83           | 1.4        | 22  | 6.70           | 0.41           | 2.0        | 4.0        |
| OPb                             | 57  | 653900 | 1.60            | 20.82           | 1.4        | 22  | 6.28           | 0.44           | 2.0        | 4.0        |
| OPb                             | 67  | 062847 | 1.95            | 12.32           | 1.6        | 20  | 3.42           | 0.16           | 2.0        | 2.0        |
| OPb                             | 129 | 064778 | 1.95            | 12.55           | 1.6        | 20  | 3.42           | 0.15           | 2.0        | 2.0        |
| OSn                             | 129 | 041954 | 1.89            | 10.77           | 3.2        | 30  | 2.11           | 0.12           | 2.0        | 2.0        |
| OSn                             | 31  | 020624 | 1.43            | 21.93           | 1.5        | 17  | 0.92           | 0.25           | 1.0        | 4.0        |
| OTl <sub>2</sub>                | 166 | 016220 | 1.24            | 33.17           | 1.7        | 24  | 1.61           | 0.17           | 1.0        | 4.0        |
| OTl <sub>2</sub>                | 12  | 077699 | 1.22            | 34.83           | 1.7        | 24  | 1.65           | 0.16           | 1.0        | 4.0        |
| OZn                             | 186 | 181039 | 1.40            | 5.61            | 32.6       | 171 | 3.41           | 0.03           | 3.0        | 1.0        |
| O <sub>2</sub> Te               | 19  | 167816 | 3.44            | 9.72            | 5.0        | 53  | 4.79           | 0.85           | 4.0        | 4.0        |
| O <sub>2</sub> V                | 10  | 001503 | 0.28            | 0.39            | 26.4       | 113 | 14.06          | 7.89           | 2.0        | 2.0        |
| O <sub>2</sub> V                | 14  | 074705 | 0.75            | 3.82            | 51.2       | 262 | 18.22          | 0.61           | 4.0        | 3.0        |
| O <sub>3</sub> Sb <sub>2</sub>  | 14  | 183102 | 2.24            | 3.83            | 2.0        | 27  | 3.08           | 1.26           | 2.0        | 2.0        |
| O <sub>3</sub> Y <sub>2</sub>   | 62  | 181828 | 0.76            | 1.81            | 19.2       | 151 | 7.32           | 0.34           | 2.0        | 1.0        |
| O <sub>5</sub> P <sub>2</sub>   | 62  | 079698 | 1.77            | 3.09            | 3.3        | 35  | 7.34           | 0.22           | 3.0        | 1.0        |
| O <sub>5</sub> Ta <sub>2</sub>  | 15  | 280396 | 0.46            | 1.10            | 12.8       | 123 | 4.66           | 5.43           | 1.0        | 2.0        |
| P <sub>2</sub> Si               | 55  | 043098 | 1.97            | 17.69           | 2.1        | 21  | 0.45           | 0.76           | 1.0        | 6.0        |

| Compound                        | SG  | ICSD   | $\beta_{SE}(p)$ | $\beta_{SE}(n)$ | $\kappa_L$ | $B$ | $m_{DOS,VB}^*$ | $m_{DOS,CB}^*$ | $N_{b,VB}$ | $N_{b,CB}$ |
|---------------------------------|-----|--------|-----------------|-----------------|------------|-----|----------------|----------------|------------|------------|
| PbS                             | 28  | 183250 | 1.51            | 6.17            | 1.4        | 18  | 1.00           | 0.10           | 1.0        | 1.0        |
| PbS                             | 39  | 068701 | 21.58           | 19.90           | 8.3        | 57  | 0.11           | 0.13           | 4.0        | 4.0        |
| PbS                             | 36  | 068969 | 25.97           | 24.90           | 7.5        | 62  | 0.11           | 0.12           | 4.0        | 4.0        |
| PbS                             | 186 | 183255 | 10.27           | 12.76           | 4.9        | 39  | 0.49           | 0.18           | 4.0        | 3.0        |
| PbS                             | 160 | 183243 | 16.57           | 15.59           | 10.2       | 57  | 0.12           | 0.13           | 4.0        | 4.0        |
| PbS                             | 62  | 648451 | 25.99           | 24.67           | 7.4        | 61  | 0.11           | 0.12           | 4.0        | 4.0        |
| PbSe                            | 42  | 074334 | 24.20           | 35.61           | 3.9        | 35  | 0.52           | 0.07           | 7.0        | 4.0        |
| PbSe                            | 62  | 648514 | 28.97           | 30.52           | 5.6        | 51  | 0.11           | 0.10           | 4.0        | 4.0        |
| PtS <sub>2</sub>                | 164 | 659963 | 1.89            | 18.27           | 2.8        | 28  | 0.47           | 0.70           | 1.0        | 6.0        |
| Rb <sub>2</sub> Te <sub>3</sub> | 62  | 077994 | 3.83            | 7.79            | 1.6        | 20  | 2.66           | 0.32           | 3.0        | 2.0        |
| SSn                             | 63  | 100672 | 9.21            | 3.02            | 5.2        | 37  | 0.10           | 0.12           | 2.0        | 1.0        |
| SSn                             | 62  | 651025 | 8.74            | 9.81            | 3.7        | 34  | 0.41           | 0.33           | 3.0        | 3.0        |
| S <sub>2</sub> Sn               | 186 | 043003 | 5.38            | 8.50            | 2.9        | 25  | 4.33           | 0.40           | 6.0        | 3.0        |
| S <sub>2</sub> Sn               | 164 | 650993 | 1.18            | 9.37            | 3.4        | 25  | 3.07           | 1.27           | 2.0        | 6.0        |
| S <sub>2</sub> Ti               | 164 | 651214 | 3.45            | 3.15            | 5.2        | 32  | 0.38           | 1.13           | 2.0        | 3.0        |
| S <sub>2</sub> W                | 160 | 202367 | 1.63            | 14.69           | 4.5        | 38  | 0.47           | 1.52           | 1.0        | 8.0        |
| S <sub>2</sub> Zr               | 164 | 604434 | 1.79            | 2.84            | 4.6        | 29  | 1.23           | 1.47           | 2.0        | 3.0        |
| Sb <sub>2</sub> Te              | 164 | 069557 | 3.39            | 29.38           | 4.2        | 39  | 0.78           | 0.28           | 2.0        | 6.0        |
| Sb <sub>2</sub> Te <sub>2</sub> | 164 | 020459 | 4.35            | 15.41           | 3.7        | 37  | 0.61           | 0.95           | 2.0        | 6.0        |
| Sb <sub>2</sub> Te <sub>3</sub> | 166 | 002084 | 8.90            | 5.02            | 4.2        | 34  | 0.03           | 0.07           | 1.0        | 1.0        |
| Sb <sub>2</sub> Te <sub>3</sub> | 12  | 262172 | 49.76           | 25.35           | 2.3        | 26  | 0.53           | 0.19           | 10.0       | 4.0        |
| SeSn                            | 63  | 651925 | 16.18           | 2.79            | 4.6        | 36  | 0.22           | 0.16           | 4.0        | 1.0        |
| SeSn                            | 62  | 050557 | 5.57            | 13.12           | 3.2        | 32  | 0.38           | 0.23           | 2.0        | 3.0        |
| SeZn                            | 129 | 162905 | 2.96            | 7.43            | 2.1        | 20  | 1.06           | 0.23           | 2.0        | 2.0        |
| Se <sub>2</sub> Sn              | 164 | 651910 | 4.16            | 17.02           | 3.1        | 25  | 2.24           | 0.55           | 4.0        | 6.0        |
| SnTe                            | 62  | 652743 | 8.05            | 7.52            | 2.3        | 24  | 0.24           | 0.27           | 2.0        | 2.0        |
| Te <sub>5</sub> Zr              | 63  | 085506 | 9.36            | 22.86           | 1.8        | 21  | 0.23           | 1.31           | 2.0        | 8.0        |
